# Supplementary material for: Comparing Ultralong Carbon Nanotube Growth from Methane over Mono- and Bi-Metallic Iron Chloride Catalysts
Source: MDPI journal article supplement (doi:10.3390/nano13152172), 2023-07-26
Supplement: s1 [file s1]

# Comparing Ultralong Carbon Nanotube Growth from Methane over Mono- and Bi-Metallic Iron Chloride Catalysts

Tim Yick<sup>1</sup>, Varun Shenoy Gangoli<sup>1,2</sup>, and Alvin Orbaek White<sup>1,2\*</sup>

## Supporting information

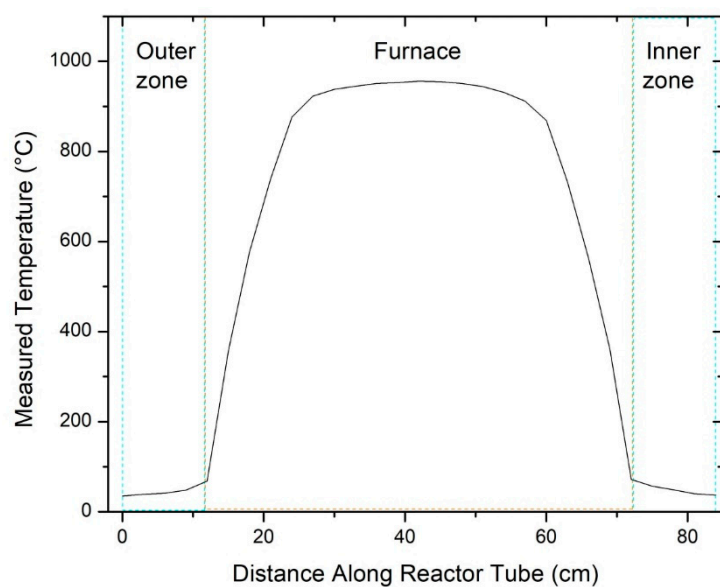

Figure S1. Temperature distribution in Carbolite Gero model 1200 tube furnace (Carbolite gero, Sheffield, UK)
